# Supplementary material for: Micro/Nanostructured Coating for Cotton Textiles That Repel Oil, Water, and Chemical Warfare Agents
Source: Polymers (Basel). 2020 Aug 14;12(8):1826. doi: 10.3390/polym12081826 (PMC7464014; doi:10.3390/polym12081826)
Supplement: Supplementary file 1 [file polymers-12-01826-s001.pdf]

## **Micro/Nanostructured Coating for Cotton Textiles that Repel Oil, Water, and Chemical Warfare Agents**

*Jihyun Kwon, Hyunsook Jung, Heesoo Jung, Juno Lee<sup>\*</sup>*

Agency for Defense Development, Yuseong-Gu, Daejeon 34186, South Korea

E-mail: juno@add.re.kr

This supplementary information includes the following sections:

### **Table S1: TGA and DTG data**

Figure S1: Surface for height of small structure.

Figure S2: SEM image of OmniBlock coated cotton fabric.

Figure S3: The optical images of water and n-dodecane droplet on the cotton fabric.

Figure S4: Optical image of HD and GD droplets.

Figure S5: Optical images of shedding angle for n-dodecane

Figure S6: The optical images of knotted cotton fabric.

**Table S1.** TGA and DTG data of raw and OmniBlock coated cotton fabrics in air and nitrogen.

| Atmosphere | Sample                     | T <sub>5%</sub><br>(°C) | T <sub>10%</sub><br>(°C) | T <sub>max1</sub><br>(°C) | Residue at<br>T <sub>max1</sub> (%) | T <sub>max2</sub><br>(°C) | Residue at<br>T <sub>max2</sub> (%) | Residue at<br>800 °C (%) |
|------------|----------------------------|-------------------------|--------------------------|---------------------------|-------------------------------------|---------------------------|-------------------------------------|--------------------------|
| Air        | Raw cotton                 | 90                      | 260                      | 327                       | 45.6                                | 415                       | 7.6                                 | 1.3                      |
|            | OmniBlock<br>coated cotton | 192                     | 273                      | 324                       | 58.2                                | 426                       | 19.4                                | 9.6                      |
| Nitrogen   | Raw cotton                 | 75                      | 273                      | 343                       | 46.0                                | -                         | -                                   | 16.3                     |
|            | OmniBlock<br>coated cotton | 219                     | 287                      | 341                       | 57.9                                | -                         | -                                   | 23.9                     |

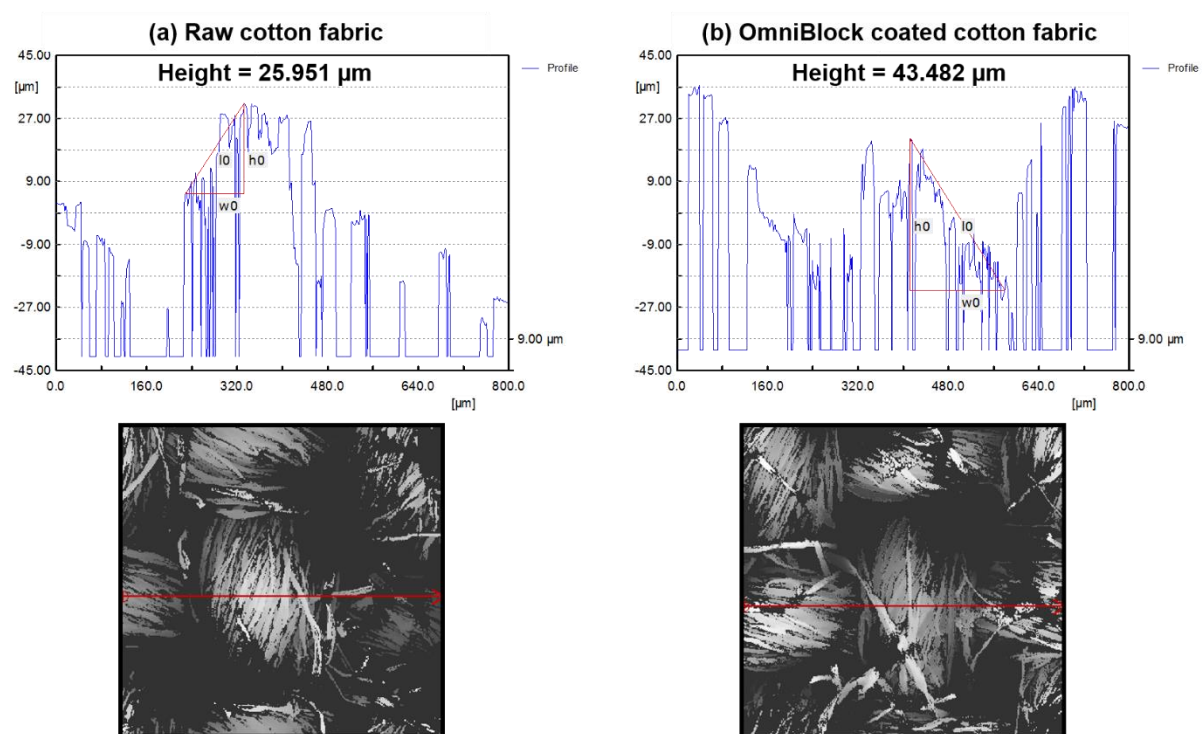

**Figure S1.** Surfaces for height of small structures of (a) raw cotton fabric and (b) OmniBlock coated cotton fabric.

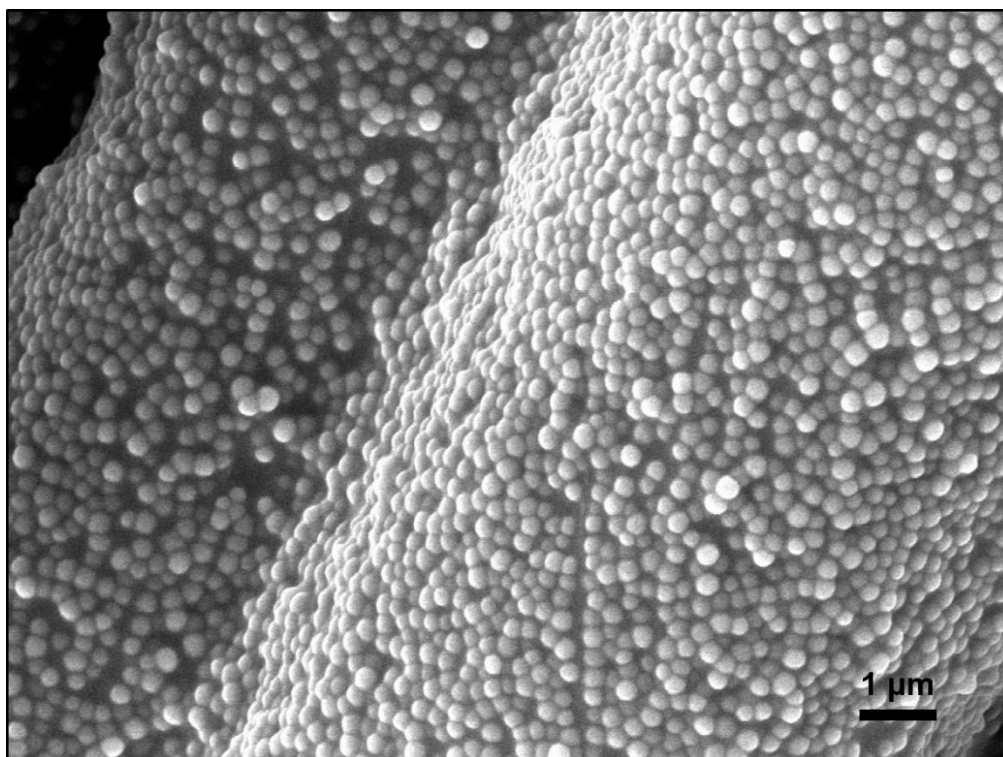

**Figure S2.** SEM image of OmniBlock coated cotton fabric.

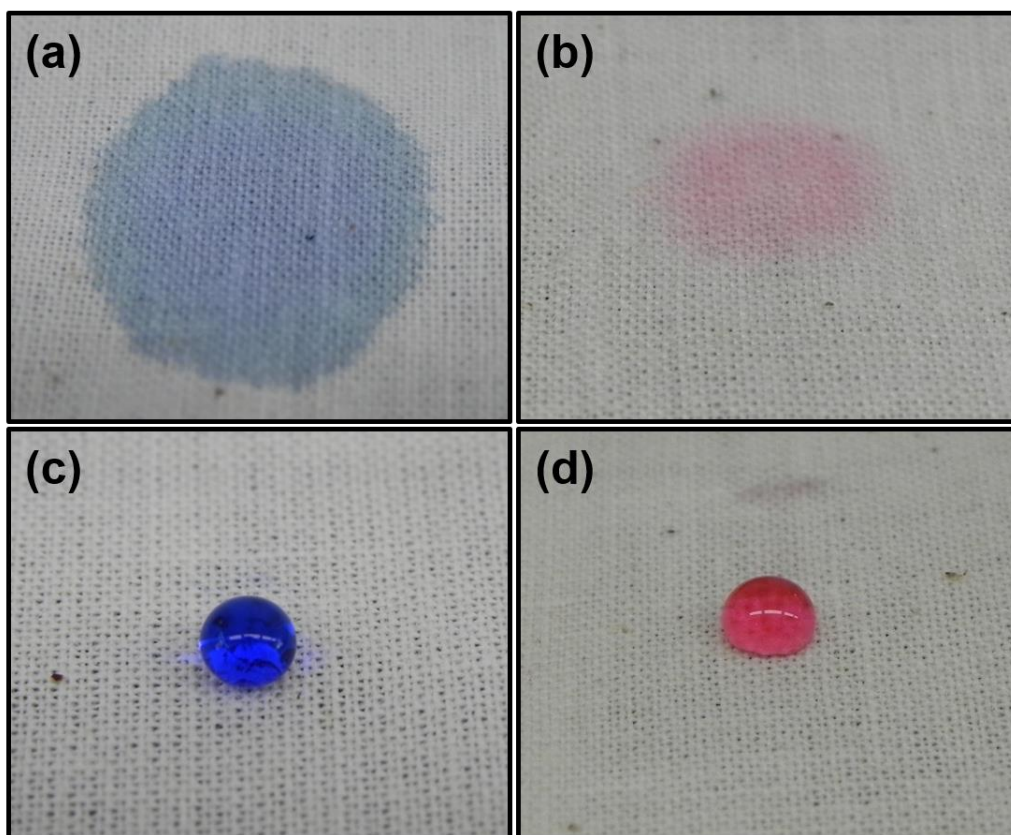

**Figure S3.** The optical images of (a) water droplet and (b) n-dodecane droplet on Ar plasma treated cotton fabric, (c) water droplet, and (d) n-dodecane droplet on OmniBlock coated cotton fabric

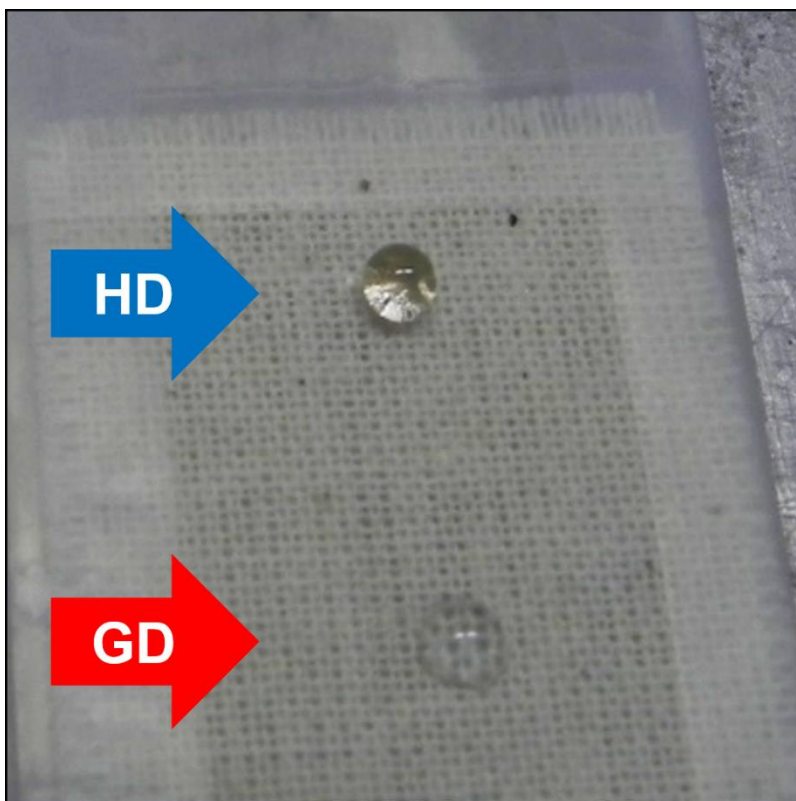

**Figure S4.** Optical image of HD and GD droplet onto OmniBlock coated cotton.

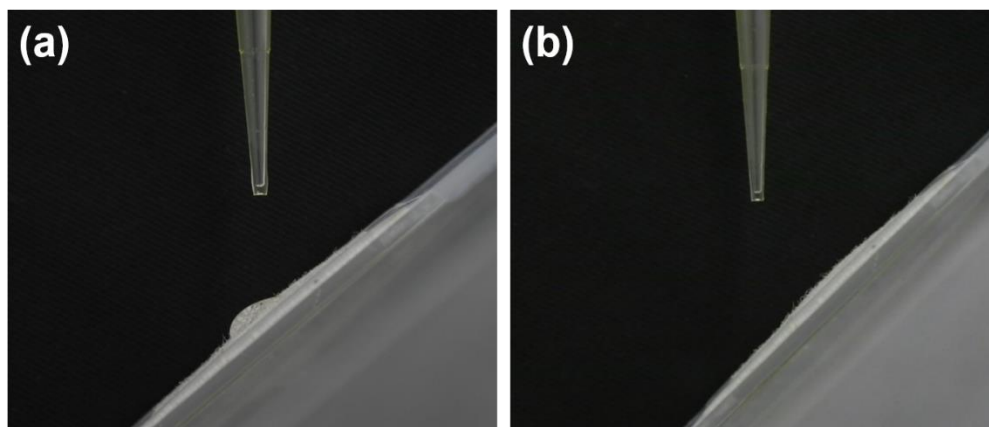

**Figure S5.** Optical images of shedding angle analysis for n-dodecane on (a) 40° and (b) 45° inclined surface.

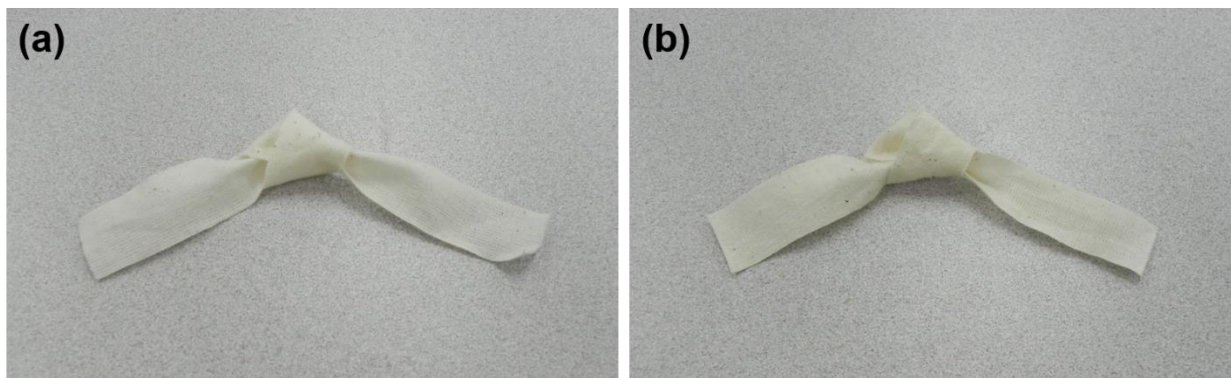

**Figure S6.** The optical images of knotted (a) raw cotton fabric and (b) OmniBlock coated cotton fabric.
